# Supplementary material for: Aspartate 496 from the subsite S2 drives specificity of human dipeptidyl peptidase III
Source: publisher site journal article supplement (doi:10.1515/hsz-2014-0247), 2015-01-10
Supplement: Supplementary file 2 [file Supplementary_Figure_2_Alignment.doc]

*Homo*  *ETGE*QIQSWYRSGET**WD**SKFSTIA**S**SY**EE**CRAESVGLYLC 519

*Felis*  ETGEQIQSWYRSGETWDSKFSTIASSYEECRAESVGLYLC 507

*Pelodiscus* ETGELVRTWYQSGETWDSKFSTIASSYEECRAECVGLYLC 526

*Salmo*  ETGEQITTWYKGNETWDSKFSTISCSYEECRAECVGLYLC 518

*Caenorhabditis* ITGAPIATWYEPGETWSSKFGPLASAYEECRAEAVGYVLC 545

*Giardia*  ENGGKLTTCYKDGETYSSVFGAMSNAFEECKAETTSMCLC 505

*Apis*  FTGELINKYFLPGETYDSKFGSLGSSYEECRAEAVGLYLS 581

*Trichoplax* LTGEKVEKWYKPGETYDSKFVSLSSSYEECRAECVGLYLC 519

*Bombyx*  LTDKGIESWYSEGETYDSKFTTLGSAFEECRAEAVGLYLS 513

*Nematostella* ETGEKIQSWYTEGETWSTKFAELSSSYEECRAECVGIYLC 528

*Aspergillus* VTNKPISSWYKPGQTWGSVFGAMSSSYEECRAECVAMALS 520

*Saccharomyces* LDGKPVSTYYKVGETWGSKFGQLAGPFEECRAEVIAMFLL 528

*Bacteroides* -----------------DALKAYGSTIEEARADLFGLYYV 487

*Croceibacter* ----------------KETLKSYKSTIEEGRADLFGLYYL 486

*Flavobacterium* ----------------KETLKSYASTLEEGRADLVGLYYL 490

*Stigmatella* ----------------SRFLKEYDNTLEEARADLVALWHA 492

: ** :*: .
